# Supplementary material
Source: Royal Society of Chemistry journal article supplement (doi:10.1039/d6dt00655h)
Supplement: d6dt00655h1.pdf [file d6dt00655h1.pdf]

## Supporting Information

### **Near-infrared long afterglow nanoparticles with photothermal and photodynamic synergistic therapeutic capabilities for tumor therapy**

Lei Zhou<sup>a</sup>, Yunjian Wang<sup>a</sup>, Du Ran<sup>b</sup>, Hongbi Zhang<sup>a</sup>, Weisheng Liu<sup>a,\*</sup>, Lu Yang<sup>c,\*\*</sup>

<sup>a</sup> The Key Laboratory of Nonferrous Metal Chemistry and Resources Utilization of Gansu Province and State Key Laboratory of Applied Organic Chemistry, College of Chemistry and Chemical Engineering, Lanzhou University, Lanzhou, 730000, PR China

<sup>b</sup> College of Chemistry and Chemical Engineering, Qinghai Normal University, Xining, 810000, PR China.

<sup>c</sup> Department of Ophthalmology, The Second Hospital & Clinical Medical School, Lanzhou University, Lanzhou, China; Gansu Province Clinical Research Center for Ophthalmology, Lanzhou, 730000, PR China

\*Corresponding author's E-mail: liuws@lzu.edu.cn (W. Liu), luyang21@lzu.edu.cn (L. Yang)

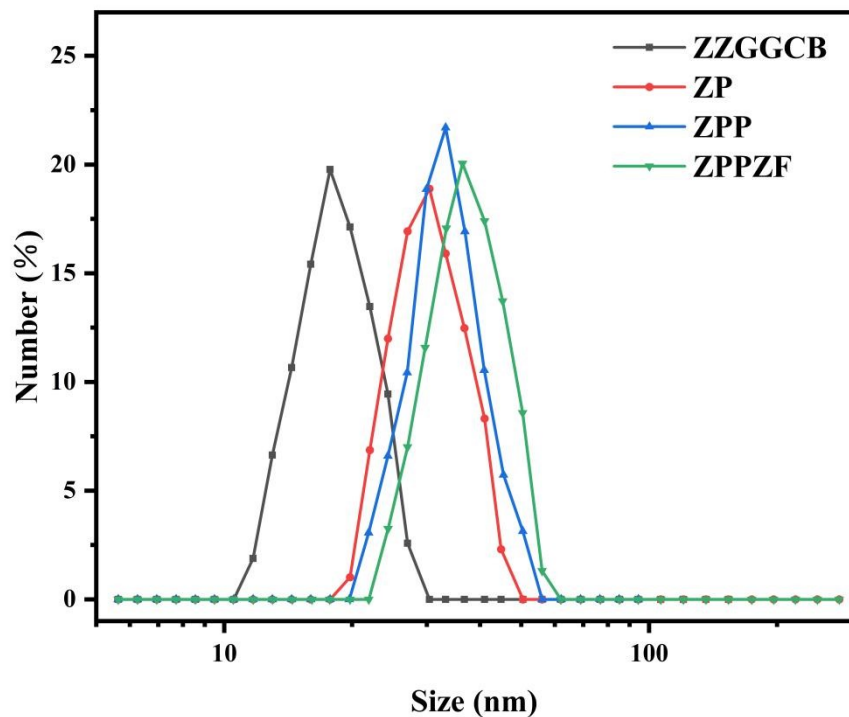

Figure S1. Hydrodynamic diameters of ZZGGCB, ZP, ZPP and ZPPZF in PBS solution.

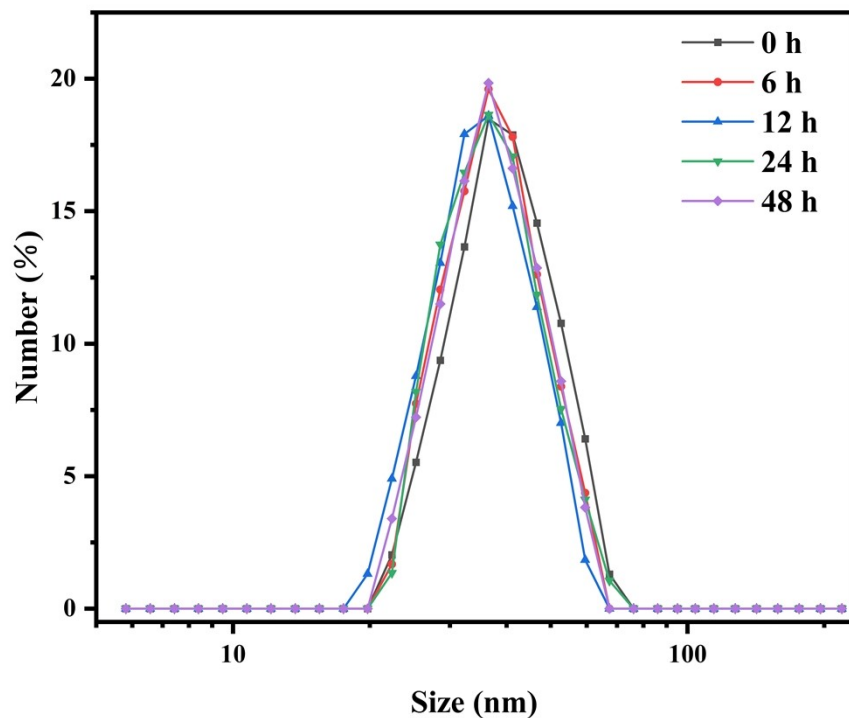

Figure S2. Hydrodynamic diameters of ZPPZF incubated in PBS for different durations.

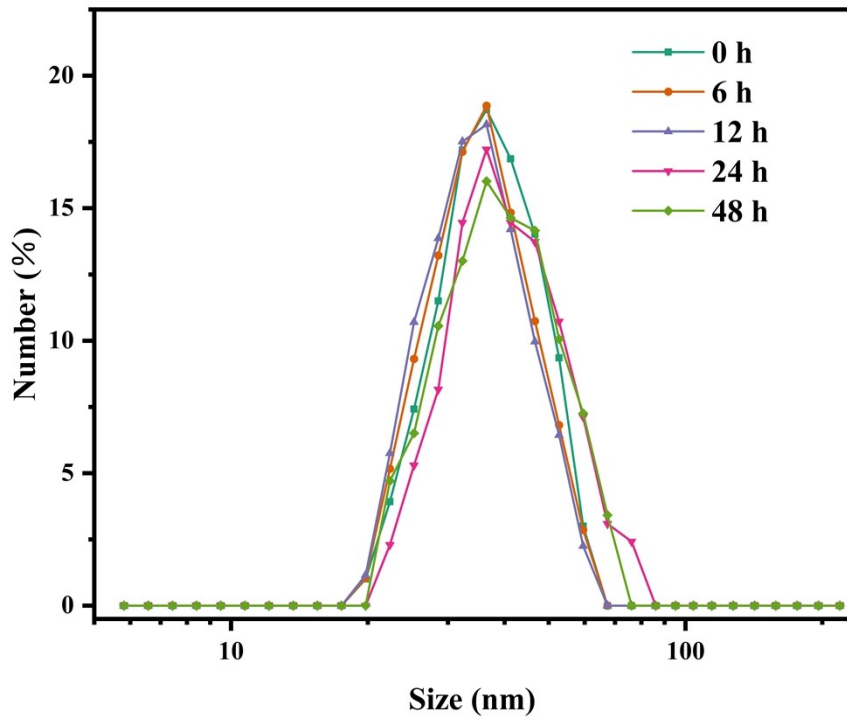

Figure S3. Hydrodynamic diameters of ZPPZF incubated in DMEM (containing 10% fetal bovine serum, FBS) for different durations.

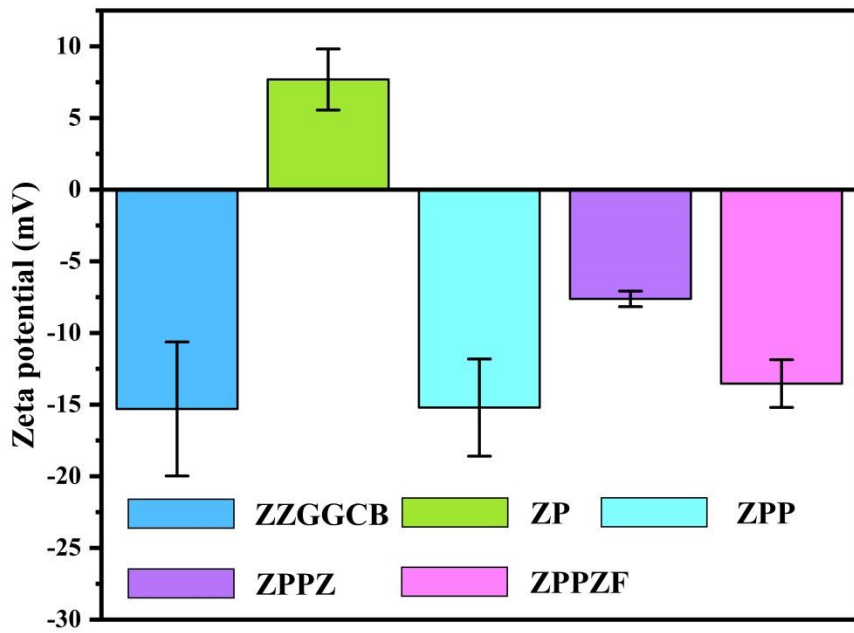

Figure S4. Zeta potentials of ZZGGCB, ZP, ZPP, ZPPZ and ZPPZF.

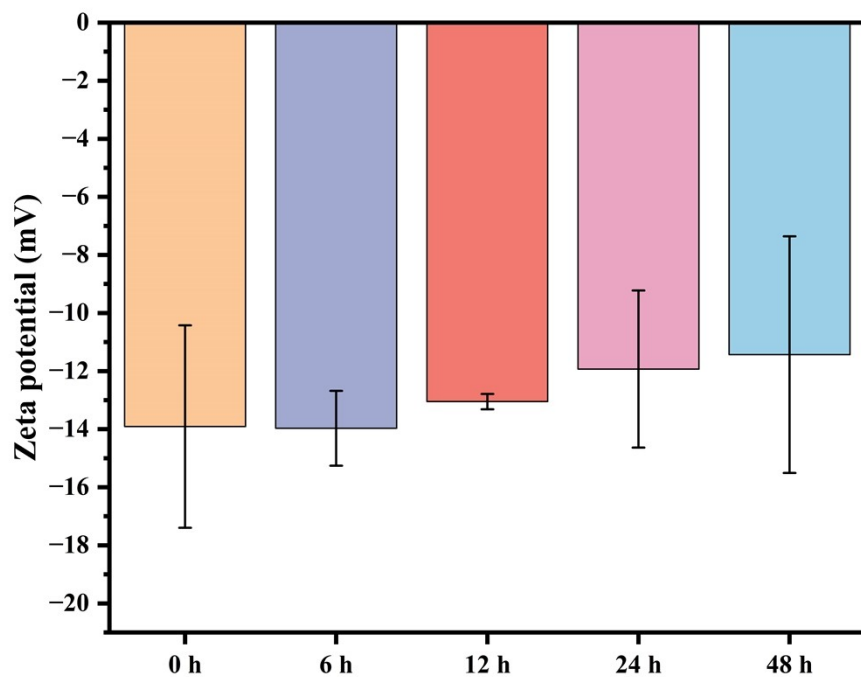

Figure S5. Zeta potentials of ZPPZF incubated in PBS for different durations.

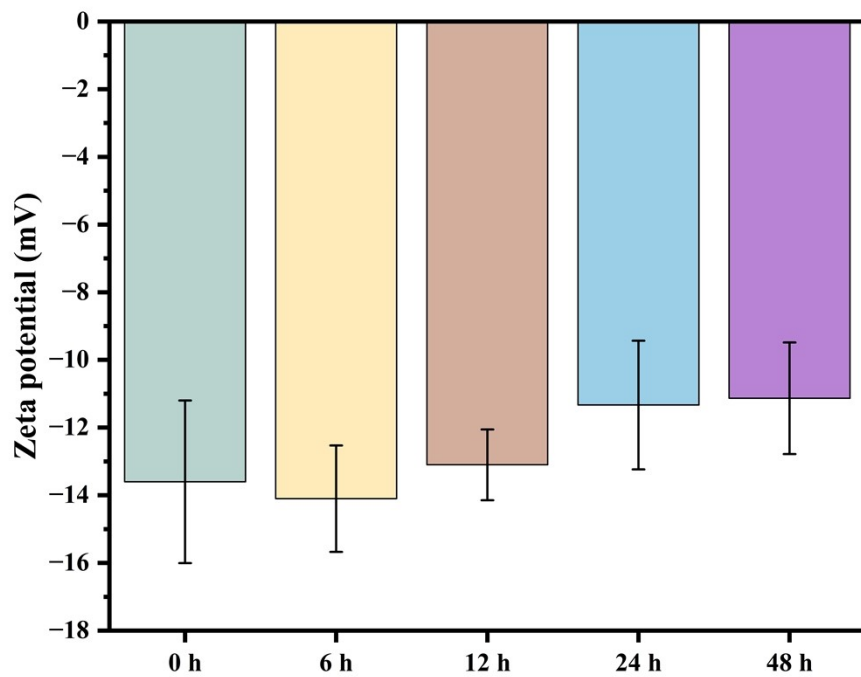

Figure S6. Zeta potentials of ZPPZF incubated in DMEM (containing 10% fetal bovine serum, FBS) for different durations.

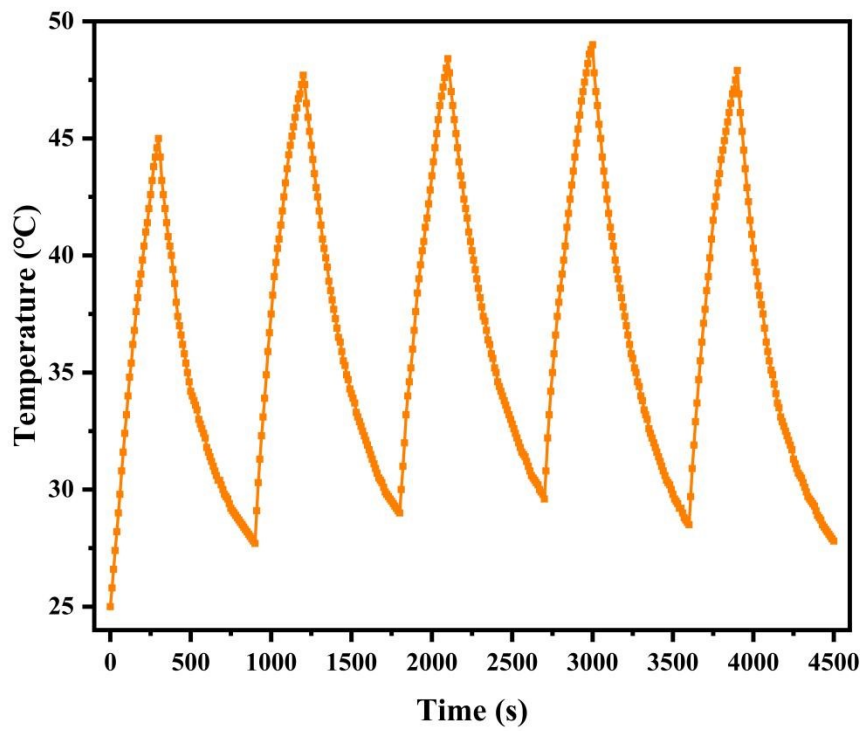

Figure S7. Five photothermal cycles of ZPPZF (750  $\mu\text{g}/\text{ml}$ ) under 808 nm laser irradiation (1.5  $\text{W}/\text{cm}^2$ ).

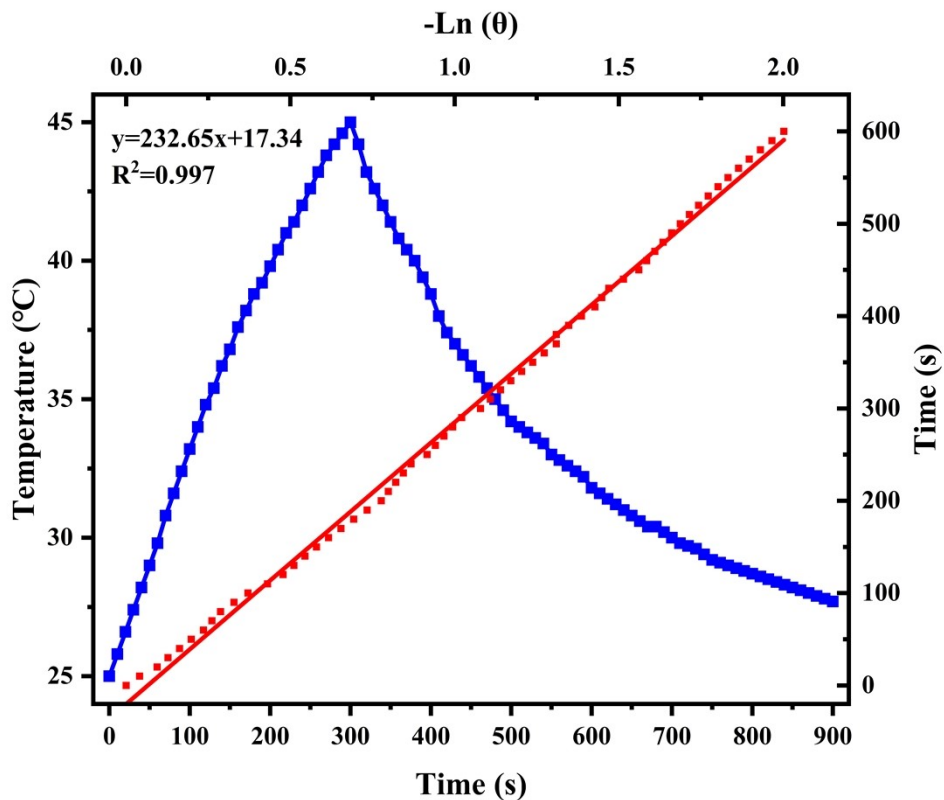

Figure S8. The heating curve under 808 nm laser, the cooling curve after the laser is turned off, and the relationship between cooling time and the negative natural logarithm of the driving force temperature.

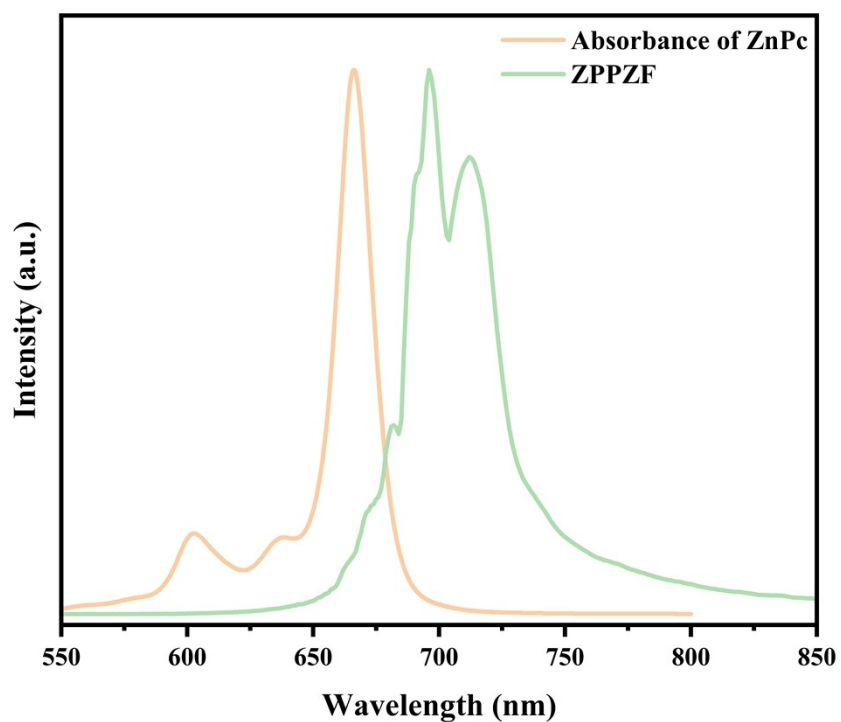

Figure S9. Absorption spectrum of ZnPc in PBS and the afterglow spectrum of ZPPZF.

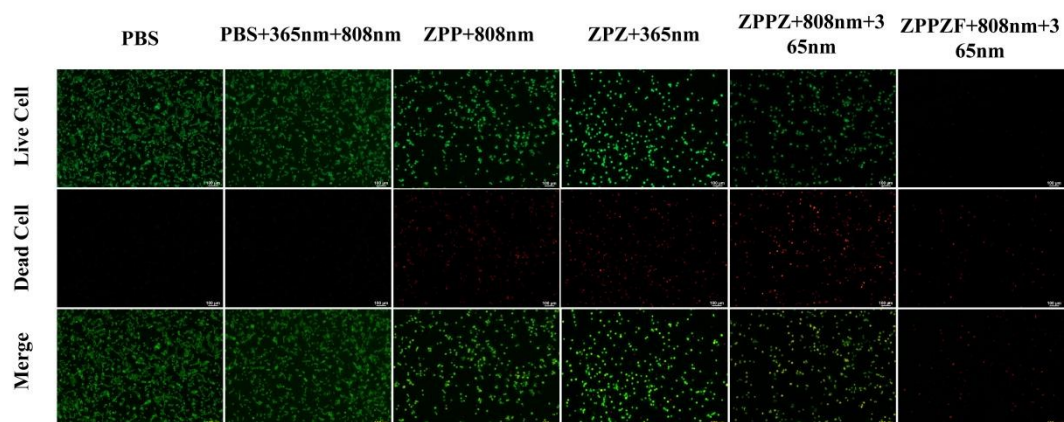

Figure S10. CLSM images of OCM-1 cells with different treatments (Live cells were stained green with calcein-AM, and dead cells were stained red with PI).

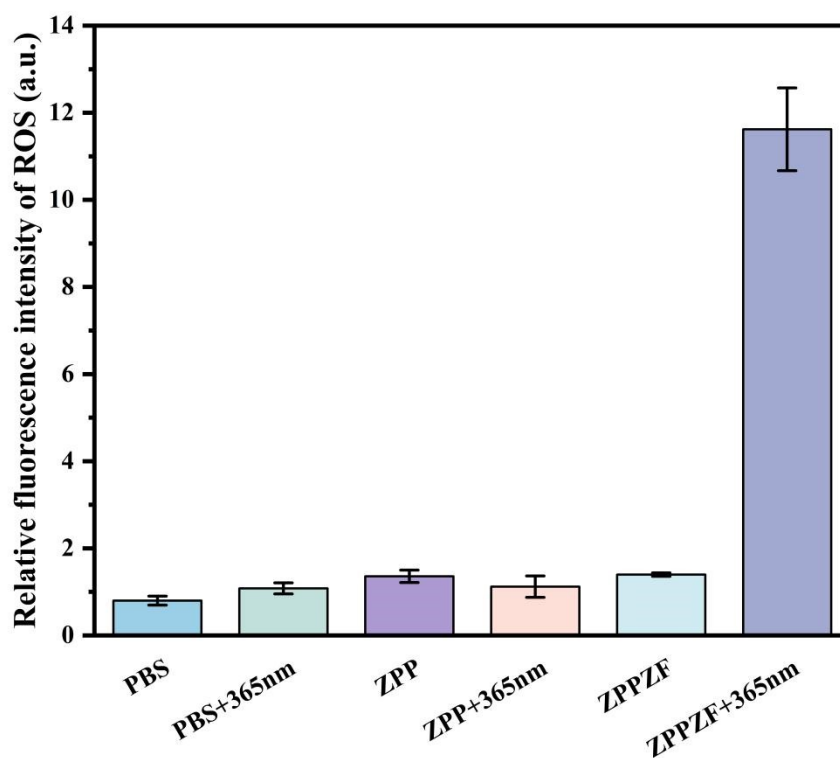

Figure S11. Average fluorescence intensity statistics (n=3).

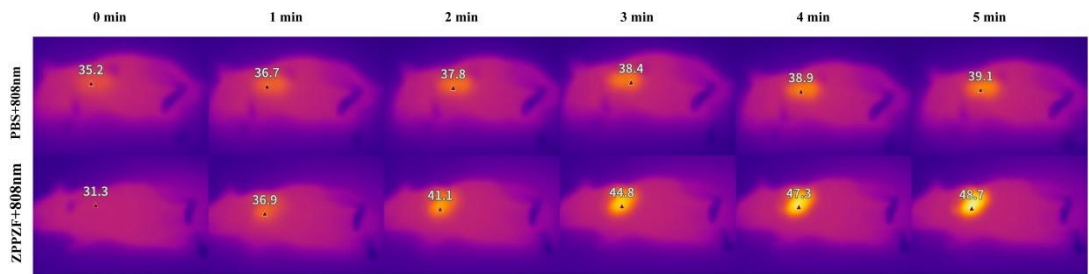

Figure S12. Thermal imaging of tumor-bearing mice.

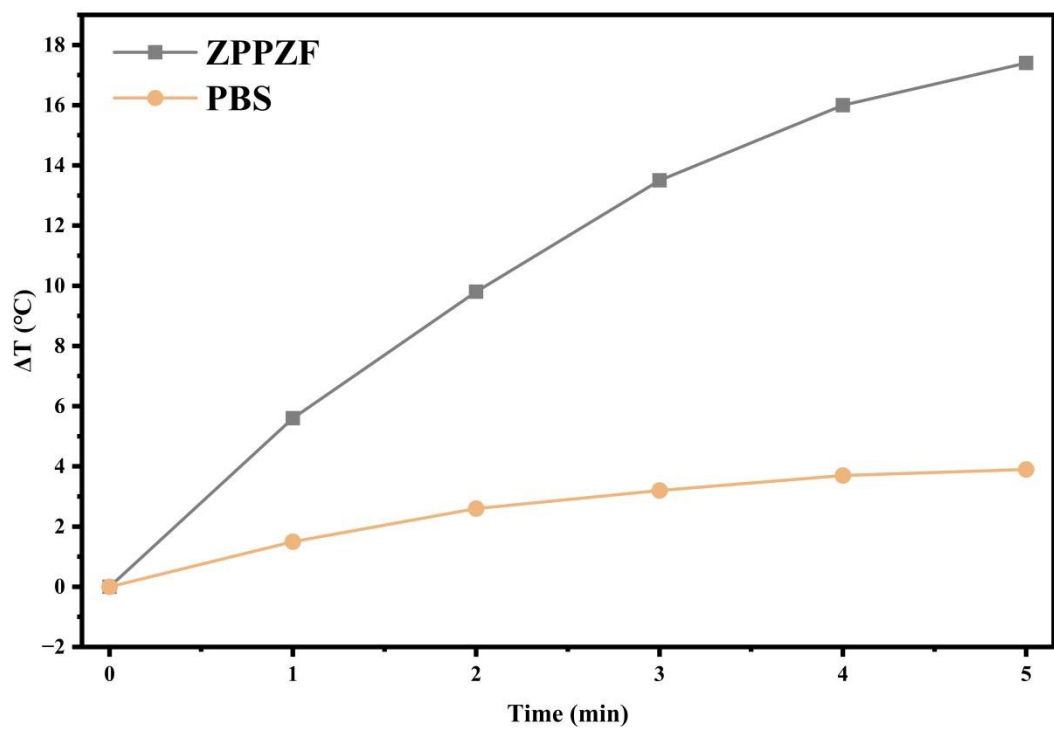

Figure S13. Curve of temperature changes at tumor sites in mice over time.
